# Supplementary material
Source: PubMed Central journal article supplement (PMC2857083)

## SUPPLEMENTAL MATERIAL

### Supplementary Figure Legends

#### Figure S1. Recombinant ATF3 and E6 proteins

(A) The sequence encoding the full-length ATF3 or  $\Delta$ 102 was cloned into pTrcHis2, and transformed into *E. coli* BL21 cells for induction. The histidine-tagged recombinant proteins were then purified with Ni<sup>+</sup>-NTA agarose and resolved in SDS-PAGE for Coomassie blue staining. (B) After immunoblotting, the blot was stained with Ponceau S for 1 min to visualize the fusion proteins.

#### Figure S2. ATF3 decreases the degradation rate of p53 in the presence of E6

E6 was pre-incubated with *in vitro*-translated ATF3 (lanes 5-8) or reticulocyte lysates programmed with the empty vector (lanes 1-4) for 30 min followed by incubation with p53 for indicated time. The p53 and ATF3 amounts were measured by immunoblotting and quantified by densitometric analysis.

#### Figure S3. ATF3 but not $\Delta$ 102 promotes CaSki cells to undergo apoptosis

(A) CaSki cells were infected with retroviruses expressing ATF3 (lane 2) or its vector pBabe (lane 1) for 2 days followed by immunoblotting. (B) CaSki cells were infected with retroviruses expressing ATF3 or its vector for 3 days, and subjected to TUNEL assays. (C) At least 300 cells were counted for their staining by TUNEL. \*  $p < 0.001$  compared to the pBabe group.

#### Figure S4. Bicistronically-expressed ATF3 promotes apoptosis of cervical cancer cells

(A) SiHa cells were transfected with GFP or GFP-IRES-ATF3 for 3 days, and then subjected to TUNEL assays. (B) At least 300 GFP-positive cells were counted for their staining by TUNEL.

#### Figure S5. Ectopically-expressed E6AP promotes p53 degradation in HeLa cells.

HeLa cells were infected with retroviruses expressing HA-E6AP or its vector (pBabe) as in Fig 7E, and subjected to immunoblotting to measure p53 levels.

# Supplementary Fig S1

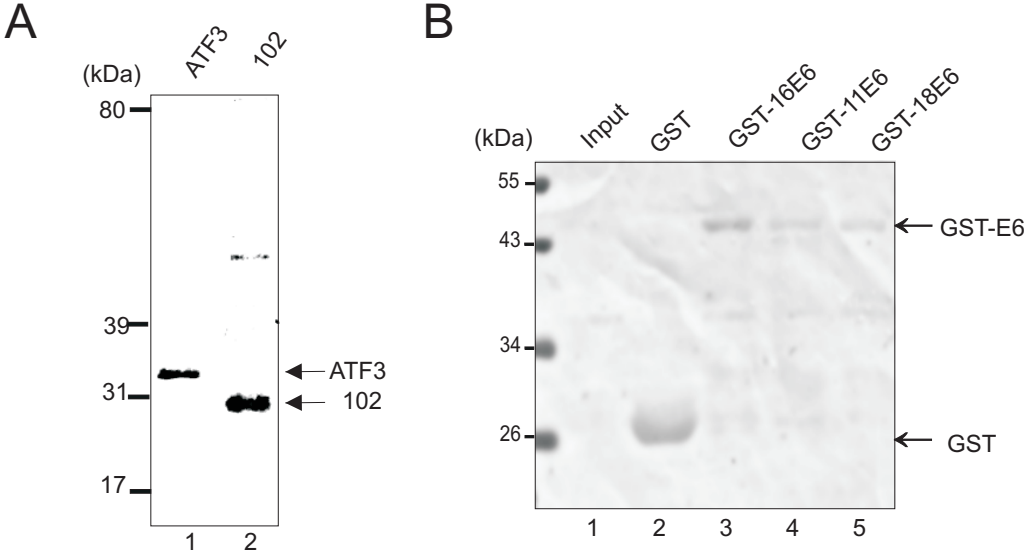

# Supplementary Fig S2

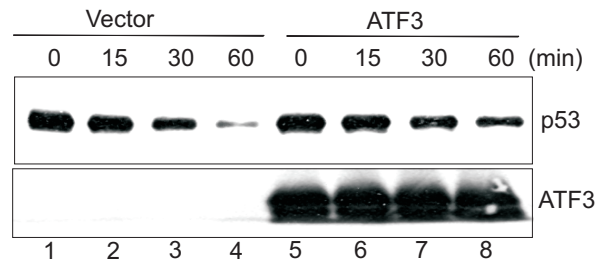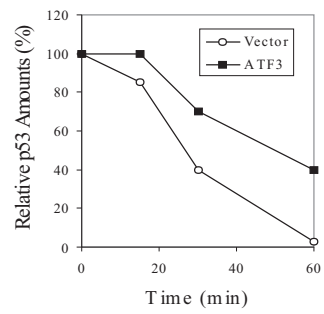

# Supplementary Fig S3

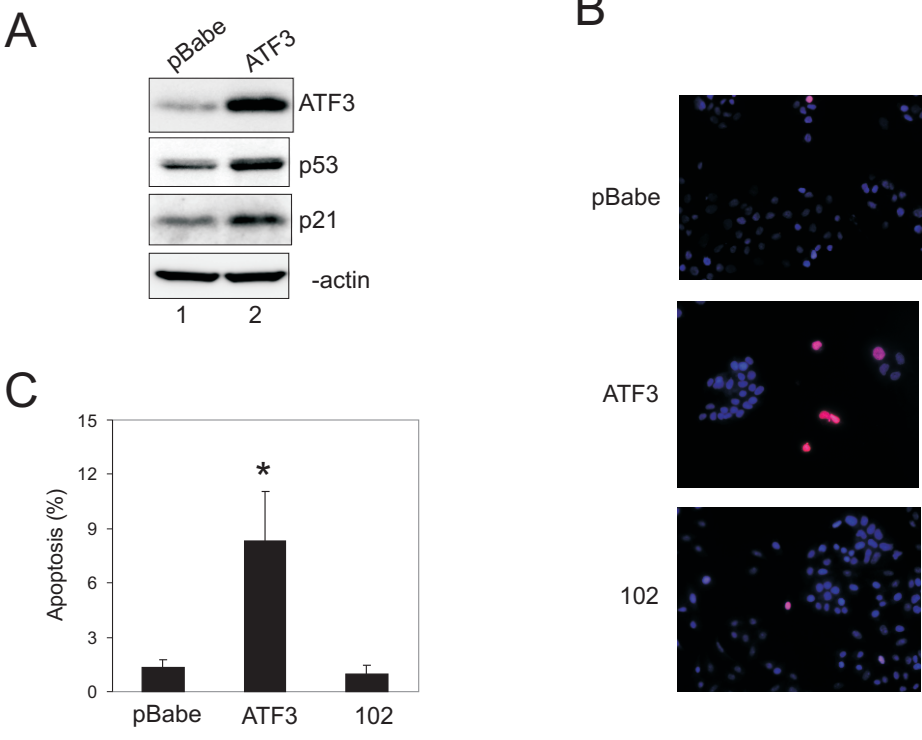

# Supplementary Fig S4

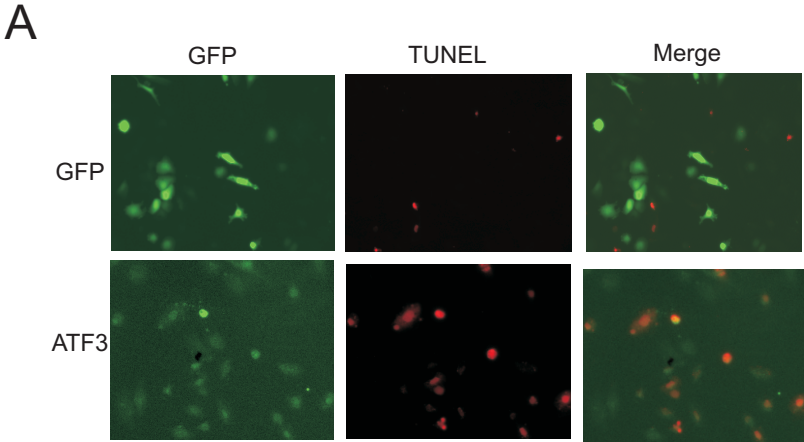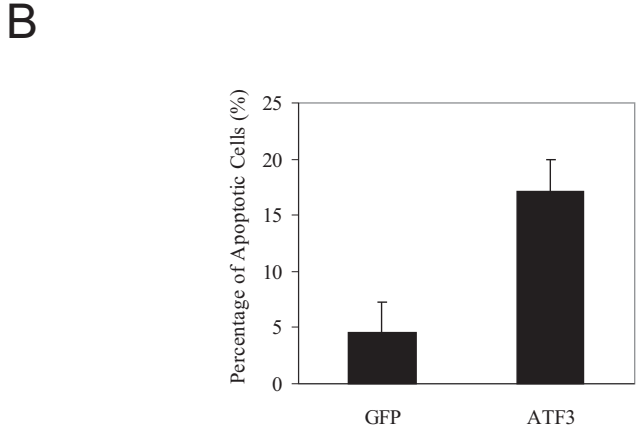

Supplementary Fig S5

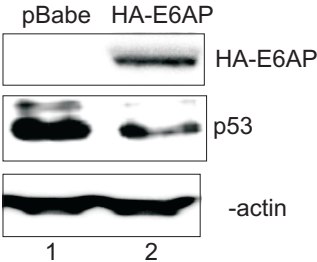

Supplement: supp_M109.058669_jbc.M109.058669-1.pdf [file supp_M109.058669_jbc.M109.058669-1.pdf]
